# Supplementary material
Source: Springer Nature journal article supplement (https://www.springermedizin.de/resource/supplementary/12885_2012_3216_MOESM1_ESM.pdf/9463202)

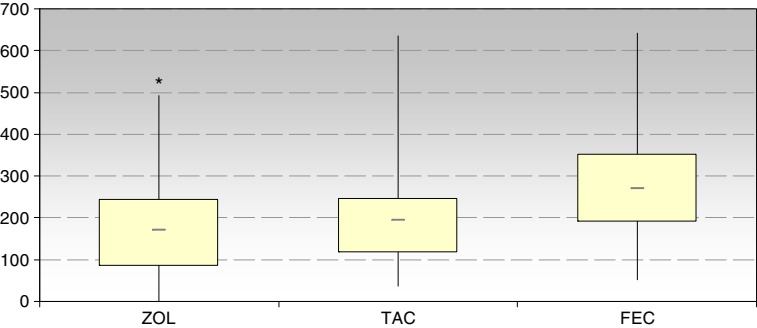

Supplement: MOESM1 [file 9463202]
